# Supplementary material for: Impact of Evacuation on the Long-Term Trend of Metabolic Syndrome after the Great East Japan Earthquake
Source: MDPI journal article supplement (doi:10.3390/ijerph19159492), 2022-08-02
Supplement: s1 [file s1]

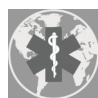

## Supplemental tables

Table S1. Prevalence of metabolic syndrome (international criteria) according to fiscal years and areas stratified by gender and age category.

|                         | 2008 | 2009 | 2010 | 2011 | 2012 | 2013 | 2014 | 2015 | 2016 | 2017 |
|-------------------------|------|------|------|------|------|------|------|------|------|------|
| <b>Total</b>            |      |      |      |      |      |      |      |      |      |      |
| <b>Mountainous area</b> | 26.5 | 26.1 | 26.3 | 26.8 | 27.2 | 27.4 | 27.9 | 27.8 | 28.8 | 28.6 |
| <b>Central area</b>     | 24.4 | 24.1 | 24.1 | 24.5 | 25.0 | 24.8 | 25.3 | 25.4 | 26.1 | 26.5 |
| <b>Coastal area</b>     | 25.9 | 25.0 | 25.5 | 25.8 | 26.6 | 26.6 | 26.6 | 26.5 | 27.3 | 27.7 |
| <b>Evacuation area</b>  | 26.8 | 26.1 | 26.7 | 29.0 | 31.1 | 31.7 | 31.9 | 32.2 | 32.9 | 32.6 |
| <b>Men</b>              |      |      |      |      |      |      |      |      |      |      |
| <b>Mountainous area</b> | 25.6 | 25.9 | 26.0 | 27.2 | 27.6 | 28.0 | 28.8 | 28.7 | 30.1 | 30.0 |
| <b>Central area</b>     | 23.9 | 24.0 | 24.2 | 24.9 | 25.6 | 25.5 | 26.2 | 26.4 | 27.1 | 28.0 |
| <b>Coastal area</b>     | 26.3 | 25.5 | 26.4 | 27.2 | 28.0 | 28.1 | 28.2 | 28.1 | 29.1 | 29.9 |
| <b>Evacuation area</b>  | 24.7 | 24.6 | 24.9 | 28.0 | 30.4 | 31.2 | 31.6 | 32.3 | 33.2 | 33.3 |
| <b>Women</b>            |      |      |      |      |      |      |      |      |      |      |
| <b>Mountainous area</b> | 27.2 | 26.1 | 26.4 | 26.3 | 26.6 | 26.8 | 27.1 | 26.9 | 27.5 | 27.4 |
| <b>Central area</b>     | 24.9 | 24.0 | 23.9 | 23.9 | 24.3 | 24.0 | 24.2 | 24.3 | 25.0 | 24.9 |
| <b>Coastal area</b>     | 25.2 | 24.1 | 24.4 | 23.9 | 25.0 | 24.8 | 24.8 | 24.7 | 25.3 | 25.3 |
| <b>Evacuation area</b>  | 28.9 | 27.6 | 28.5 | 29.9 | 31.9 | 32.1 | 32.2 | 32.3 | 32.5 | 31.7 |
| <b>Age &lt;60 years</b> |      |      |      |      |      |      |      |      |      |      |
| <b>Mountainous area</b> | 21.0 | 20.6 | 20.5 | 20.9 | 21.2 | 21.2 | 21.8 | 21.4 | 21.9 | 22.3 |
| <b>Central area</b>     | 19.4 | 19.2 | 19.3 | 19.3 | 19.7 | 19.4 | 19.8 | 19.7 | 20.3 | 20.5 |
| <b>Coastal area</b>     | 21.6 | 20.5 | 20.9 | 21.1 | 21.9 | 21.8 | 21.6 | 21.1 | 21.8 | 22.2 |
| <b>Evacuation area</b>  | 21.3 | 20.6 | 20.7 | 22.6 | 24.7 | 25.1 | 25.1 | 25.0 | 25.5 | 25.6 |
| <b>Age ≥60 years</b>    |      |      |      |      |      |      |      |      |      |      |
| <b>Mountainous area</b> | 34.5 | 34.1 | 34.4 | 34.8 | 35.3 | 35.8 | 36.3 | 36.4 | 37.8 | 37.1 |
| <b>Central area</b>     | 33.4 | 32.7 | 32.6 | 33.1 | 33.9 | 34.1 | 34.6 | 34.9 | 35.9 | 36.5 |
| <b>Coastal area</b>     | 34.1 | 33.0 | 33.7 | 33.8 | 34.7 | 34.8 | 35.3 | 35.8 | 36.6 | 37.1 |
| <b>Evacuation area</b>  | 33.9 | 33.1 | 34.2 | 36.7 | 39.1 | 39.8 | 40.2 | 41.1 | 41.7 | 41.0 |

Table S2. Risk ratios and 95% confidence intervals of metabolic syndrome after the Great East Japan Earthquake compared to that before the disaster (international criteria).

|                         | 2008–2010 | 2011                | 2012                | 2013                | 2014                | 2015                | 2016                | 2017                |
|-------------------------|-----------|---------------------|---------------------|---------------------|---------------------|---------------------|---------------------|---------------------|
| <b>Total</b>            |           |                     |                     |                     |                     |                     |                     |                     |
| Mountainous area        | 1.00      | 1.02<br>(1.00–1.04) | 1.03<br>(1.02–1.05) | 1.04<br>(1.02–1.06) | 1.06<br>(1.04–1.08) | 1.06<br>(1.04–1.08) | 1.10<br>(1.08–1.12) | 1.09<br>(1.07–1.11) |
| Central area            | 1.00      | 1.01<br>(1.00–1.02) | 1.03<br>(1.02–1.04) | 1.03<br>(1.02–1.04) | 1.04<br>(1.03–1.05) | 1.05<br>(1.04–1.06) | 1.08<br>(1.07–1.09) | 1.09<br>(1.08–1.10) |
| Coastal area            | 1.00      | 1.01<br>(0.99–1.03) | 1.05<br>(1.03–1.06) | 1.04<br>(1.03–1.06) | 1.04<br>(1.03–1.06) | 1.04<br>(1.02–1.05) | 1.07<br>(1.05–1.09) | 1.08<br>(1.07–1.10) |
| Evacuation area         | 1.00      | 1.10<br>(1.07–1.13) | 1.18<br>(1.15–1.21) | 1.20<br>(1.17–1.23) | 1.20<br>(1.18–1.23) | 1.22<br>(1.19–1.24) | 1.24<br>(1.22–1.27) | 1.23<br>(1.20–1.25) |
| <b>Men</b>              |           |                     |                     |                     |                     |                     |                     |                     |
| Mountainous area        | 1.00      | 1.05<br>(1.03–1.08) | 1.07<br>(1.04–1.10) | 1.08<br>(1.05–1.11) | 1.11<br>(1.09–1.14) | 1.11<br>(1.08–1.14) | 1.16<br>(1.14–1.19) | 1.16<br>(1.13–1.19) |
| Central area            | 1.00      | 1.03<br>(1.02–1.05) | 1.06<br>(1.05–1.08) | 1.06<br>(1.04–1.07) | 1.08<br>(1.07–1.10) | 1.09<br>(1.08–1.10) | 1.12<br>(1.11–1.14) | 1.16<br>(1.14–1.17) |
| Coastal area            | 1.00      | 1.04<br>(1.02–1.07) | 1.07<br>(1.05–1.10) | 1.07<br>(1.05–1.10) | 1.08<br>(1.05–1.10) | 1.07<br>(1.05–1.09) | 1.11<br>(1.09–1.13) | 1.14<br>(1.11–1.16) |
| Evacuation area         | 1.00      | 1.13<br>(1.09–1.17) | 1.23<br>(1.19–1.27) | 1.26<br>(1.22–1.30) | 1.27<br>(1.23–1.31) | 1.30<br>(1.26–1.34) | 1.33<br>(1.29–1.37) | 1.33<br>(1.30–1.38) |
| <b>Women</b>            |           |                     |                     |                     |                     |                     |                     |                     |
| Mountainous area        | 1.00      | 0.99<br>(0.97–1.02) | 1.01<br>(0.98–1.03) | 1.01<br>(0.99–1.04) | 1.02<br>(1.00–1.05) | 1.02<br>(0.99–1.04) | 1.04<br>(1.02–1.07) | 1.04<br>(1.01–1.07) |
| Central area            | 1.00      | 0.99<br>(0.98–1.01) | 1.01<br>(0.99–1.02) | 0.99<br>(0.98–1.01) | 1.00<br>(0.99–1.02) | 1.01<br>(0.99–1.02) | 1.04<br>(1.02–1.05) | 1.03<br>(1.02–1.04) |
| Coastal area            | 1.00      | 0.97<br>(0.95–1.00) | 1.02<br>(0.99–1.05) | 1.01<br>(0.99–1.04) | 1.01<br>(0.98–1.03) | 1.00<br>(0.98–1.03) | 1.03<br>(1.01–1.06) | 1.03<br>(1.00–1.06) |
| Evacuation area         | 1.00      | 1.06<br>(1.02–1.10) | 1.13<br>(1.10–1.17) | 1.14<br>(1.11–1.18) | 1.14<br>(1.11–1.18) | 1.15<br>(1.11–1.18) | 1.16<br>(1.12–1.19) | 1.13<br>(1.09–1.16) |
| <b>Age &lt;60 years</b> |           |                     |                     |                     |                     |                     |                     |                     |
| Mountainous area        | 1.00      | 1.01<br>(0.99–1.04) | 1.02<br>(1.00–1.05) | 1.03<br>(1.00–1.05) | 1.06<br>(1.03–1.08) | 1.03<br>(1.01–1.06) | 1.06<br>(1.03–1.09) | 1.08<br>(1.05–1.11) |
| Central area            | 1.00      | 1.00<br>(0.99–1.02) | 1.02<br>(1.01–1.03) | 1.01<br>(0.99–1.02) | 1.03<br>(1.01–1.04) | 1.02<br>(1.01–1.04) | 1.05<br>(1.04–1.06) | 1.07<br>(1.05–1.08) |
| Coastal area            | 1.00      | 1.00<br>(0.98–1.03) | 1.04<br>(1.02–1.07) | 1.04<br>(1.01–1.06) | 1.03<br>(1.00–1.05) | 1.00<br>(0.98–1.03) | 1.04<br>(1.02–1.06) | 1.06<br>(1.04–1.08) |
| Evacuation area         | 1.00      | 1.08<br>(1.04–1.12) | 1.18<br>(1.14–1.22) | 1.20<br>(1.16–1.24) | 1.21<br>(1.17–1.25) | 1.20<br>(1.16–1.24) | 1.22<br>(1.19–1.27) | 1.23<br>(1.19–1.27) |
| <b>Age ≥60 years</b>    |           |                     |                     |                     |                     |                     |                     |                     |
| Mountainous area        | 1.00      | 1.01<br>(0.99–1.04) | 1.03<br>(1.00–1.06) | 1.04<br>(1.02–1.07) | 1.06<br>(1.03–1.08) | 1.06<br>(1.04–1.09) | 1.10<br>(1.08–1.13) | 1.08<br>(1.06–1.11) |
| Central area            | 1.00      | 1.01<br>(0.99–1.02) | 1.03<br>(1.02–1.05) | 1.04<br>(1.02–1.05) | 1.05<br>(1.04–1.07) | 1.06<br>(1.05–1.08) | 1.09<br>(1.08–1.11) | 1.11<br>(1.09–1.12) |
| Coastal area            | 1.00      | 1.01<br>(0.98–1.03) | 1.03<br>(1.01–1.06) | 1.04<br>(1.01–1.06) | 1.05<br>(1.03–1.08) | 1.06<br>(1.04–1.09) | 1.09<br>(1.06–1.11) | 1.10<br>(1.08–1.13) |
| Evacuation area         | 1.00      | 1.09<br>(1.05–1.13) | 1.16<br>(1.12–1.20) | 1.18<br>(1.14–1.21) | 1.19<br>(1.16–1.23) | 1.22<br>(1.18–1.25) | 1.24<br>(1.20–1.27) | 1.21<br>(1.18–1.25) |

Table S3. Risk ratios and 95% confidence intervals of metabolic syndrome (international criteria) for the evacuation area compared with the mountainous area in 2008–2017.

|                  | 2008             | 2009             | 2010             | 2011             | 2012             |
|------------------|------------------|------------------|------------------|------------------|------------------|
| <b>Total</b>     |                  |                  |                  |                  |                  |
| Mountainous area | 1.00             | 1.00             | 1.00             | 1.00             | 1.00             |
| Central area     | 0.96 (0.94–0.98) | 0.96 (0.94–0.98) | 0.95 (0.94–0.97) | 0.95 (0.93–0.97) | 0.95 (0.94–0.97) |
| Coastal area     | 1.02 (1.00–1.04) | 1.00 (0.98–1.02) | 1.01 (0.99–1.04) | 1.00 (0.98–1.02) | 1.02 (1.00–1.04) |

|                         |                  |                  |                  |                  |                  |
|-------------------------|------------------|------------------|------------------|------------------|------------------|
| <b>Evacuation area</b>  | 1.00 (0.97–1.02) | 0.99 (0.96–1.01) | 1.00 (0.98–1.03) | 1.07 (1.04–1.10) | 1.13 (1.10–1.16) |
| <b>Men</b>              |                  |                  |                  |                  |                  |
| <b>Mountainous area</b> | 1.00             | 1.00             | 1.00             | 1.00             | 1.00             |
| <b>Central area</b>     | 0.95 (0.92–0.98) | 0.94 (0.92–0.97) | 0.95 (0.93–0.98) | 0.93 (0.91–0.96) | 0.94 (0.92–0.97) |
| <b>Coastal area</b>     | 1.05 (1.02–1.09) | 1.01 (0.97–1.04) | 1.04 (1.01–1.07) | 1.03 (1.00–1.06) | 1.04 (1.01–1.07) |
| <b>Evacuation area</b>  | 0.96 (0.92–1.00) | 0.94 (0.91–0.98) | 0.95 (0.92–0.99) | 1.02 (0.99–1.06) | 1.09 (1.05–1.13) |
| <b>Women</b>            |                  |                  |                  |                  |                  |
| <b>Mountainous area</b> | 1.00             | 1.00             | 1.00             | 1.00             | 1.00             |
| <b>Central area</b>     | 0.97 (0.95–1.00) | 0.97 (0.95–1.00) | 0.96 (0.94–0.99) | 0.96 (0.94–0.99) | 0.97 (0.94–0.99) |
| <b>Coastal area</b>     | 0.98 (0.95–1.01) | 0.97 (0.94–1.01) | 0.97 (0.94–1.00) | 0.96 (0.92–0.99) | 0.98 (0.95–1.02) |
| <b>Evacuation area</b>  | 1.05 (1.01–1.09) | 1.05 (1.01–1.08) | 1.07 (1.03–1.11) | 1.13 (1.08–1.17) | 1.18 (1.14–1.23) |
| <b>Age &lt;60 years</b> |                  |                  |                  |                  |                  |
| <b>Mountainous area</b> | 1.00             | 1.00             | 1.00             | 1.00             | 1.00             |
| <b>Central area</b>     | 0.92 (0.89–0.94) | 0.92 (0.90–0.95) | 0.93 (0.90–0.96) | 0.91 (0.89–0.94) | 0.92 (0.89–0.94) |
| <b>Coastal area</b>     | 1.01 (0.98–1.05) | 0.98 (0.95–1.01) | 1.00 (0.97–1.04) | 0.99 (0.96–1.02) | 1.01 (0.98–1.04) |
| <b>Evacuation area</b>  | 1.01 (0.97–1.05) | 1.00 (0.96–1.04) | 1.01 (0.97–1.05) | 1.07 (1.03–1.11) | 1.16 (1.11–1.20) |
| <b>Age ≥60 years</b>    |                  |                  |                  |                  |                  |
| <b>Mountainous area</b> | 1.00             | 1.00             | 1.00             | 1.00             | 1.00             |
| <b>Central area</b>     | 0.98 (0.95–1.00) | 0.97 (0.94–0.99) | 0.95 (0.93–0.98) | 0.96 (0.93–0.98) | 0.96 (0.94–0.99) |
| <b>Coastal area</b>     | 1.00 (0.96–1.03) | 0.97 (0.94–1.01) | 0.99 (0.96–1.02) | 0.98 (0.95–1.01) | 0.99 (0.96–1.02) |
| <b>Evacuation area</b>  | 0.99 (0.96–1.03) | 0.98 (0.95–1.02) | 1.00 (0.97–1.04) | 1.06 (1.02–1.10) | 1.11 (1.08–1.15) |

|                         | 2013             | 2014             | 2015             | 2016             | 2017             |
|-------------------------|------------------|------------------|------------------|------------------|------------------|
| <b>Total</b>            |                  |                  |                  |                  |                  |
| <b>Mountainous area</b> | 1.00             | 1.00             | 1.00             | 1.00             | 1.00             |
| <b>Central area</b>     | 0.94 (0.93–0.96) | 0.94 (0.92–0.95) | 0.95 (0.93–0.96) | 0.94 (0.93–0.96) | 0.96 (0.94–0.97) |
| <b>Coastal area</b>     | 1.01 (0.99–1.03) | 0.99 (0.97–1.01) | 0.99 (0.97–1.01) | 0.98 (0.97–1.00) | 1.00 (0.98–1.02) |
| <b>Evacuation area</b>  | 1.14 (1.11–1.17) | 1.12 (1.10–1.15) | 1.14 (1.11–1.17) | 1.12 (1.10–1.15) | 1.11 (1.09–1.14) |
| <b>Men</b>              |                  |                  |                  |                  |                  |
| <b>Mountainous area</b> | 1.00             | 1.00             | 1.00             | 1.00             | 1.00             |
| <b>Central area</b>     | 0.93 (0.91–0.96) | 0.93 (0.91–0.95) | 0.94 (0.92–0.96) | 0.92 (0.90–0.94) | 0.96 (0.94–0.98) |
| <b>Coastal area</b>     | 1.03 (1.00–1.06) | 1.01 (0.98–1.03) | 1.01 (0.98–1.03) | 0.99 (0.97–1.02) | 1.03 (1.00–1.05) |
| <b>Evacuation area</b>  | 1.10 (1.07–1.14) | 1.08 (1.05–1.12) | 1.11 (1.07–1.14) | 1.09 (1.05–1.12) | 1.09 (1.06–1.13) |
| <b>Women</b>            |                  |                  |                  |                  |                  |
| <b>Mountainous area</b> | 1.00             | 1.00             | 1.00             | 1.00             | 1.00             |
| <b>Central area</b>     | 0.95 (0.93–0.97) | 0.94 (0.92–0.97) | 0.96 (0.93–0.98) | 0.96 (0.94–0.98) | 0.96 (0.93–0.98) |
| <b>Coastal area</b>     | 0.97 (0.94–1.00) | 0.96 (0.93–0.99) | 0.96 (0.93–0.99) | 0.96 (0.93–0.99) | 0.96 (0.93–0.99) |
| <b>Evacuation area</b>  | 1.19 (1.14–1.23) | 1.17 (1.13–1.21) | 1.18 (1.14–1.22) | 1.16 (1.12–1.20) | 1.14 (1.10–1.18) |
| <b>Age &lt;60 years</b> |                  |                  |                  |                  |                  |
| <b>Mountainous area</b> | 1.00             | 1.00             | 1.00             | 1.00             | 1.00             |
| <b>Central area</b>     | 0.90 (0.88–0.93) | 0.90 (0.87–0.92) | 0.91 (0.89–0.93) | 0.91 (0.89–0.93) | 0.91 (0.89–0.93) |
| <b>Coastal area</b>     | 1.01 (0.97–1.04) | 0.97 (0.94–1.00) | 0.96 (0.94–0.99) | 0.97 (0.94–1.00) | 0.98 (0.95–1.00) |
| <b>Evacuation area</b>  | 1.17 (1.13–1.22) | 1.15 (1.11–1.19) | 1.16 (1.12–1.20) | 1.16 (1.12–1.20) | 1.14 (1.10–1.18) |
| <b>Age ≥60 years</b>    |                  |                  |                  |                  |                  |
| <b>Mountainous area</b> | 1.00             | 1.00             | 1.00             | 1.00             | 1.00             |
| <b>Central area</b>     | 0.95 (0.93–0.98) | 0.96 (0.93–0.98) | 0.96 (0.94–0.99) | 0.95 (0.93–0.97) | 0.99 (0.96–1.01) |
| <b>Coastal area</b>     | 0.98 (0.95–1.00) | 0.98 (0.95–1.01) | 0.99 (0.96–1.01) | 0.97 (0.95–1.00) | 1.00 (0.98–1.03) |
| <b>Evacuation area</b>  | 1.11 (1.08–1.15) | 1.11 (1.08–1.15) | 1.13 (1.10–1.17) | 1.11 (1.07–1.14) | 1.11 (1.08–1.14) |
